# Supplementary material
Source: publisher figshare collection journal article supplement (https://karger.figshare.com/ndownloader/files/14341598)
Supplement: Supplementary file 1 [file 14341598]

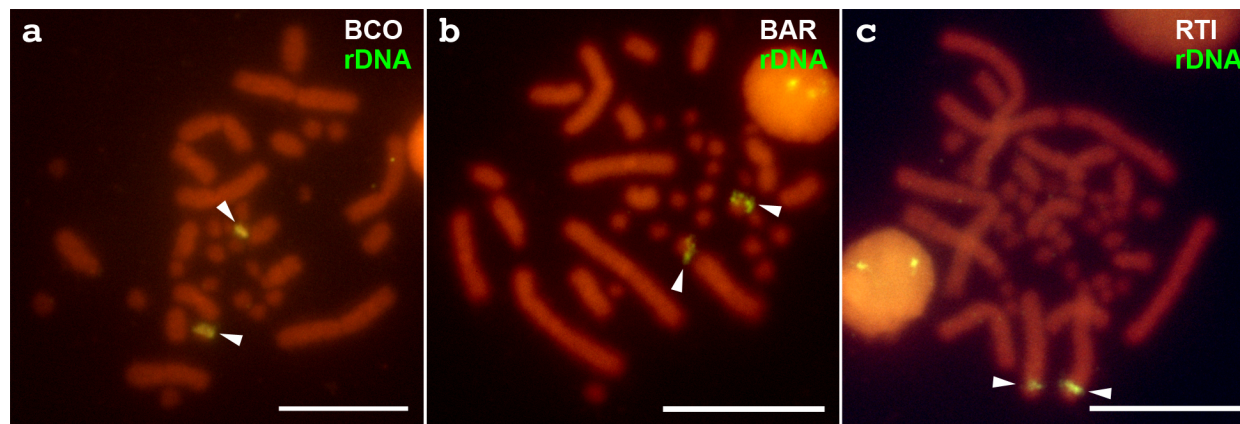

**Suppl. Fig. S1.** FISH mapping of 18S-28S rDNA in snake species. A human genomic clone of 18S-28S rDNA hybridized to a pair of microchromosomes in *B. constrictor* (BCO) (**a**) and *B. arietans* (BAR) (**b**), and to subtelomeric regions of chromosome 4q in *R. tigrinus* (RTI) (**c**). Arrowheads indicate hybridization signals. Scale bars represent 10  $\mu$ m.
